# Supplementary material for: Hollow terbium metal–organic-framework spheres: preparation and their performance in Fe3+ detection
Source: Royal Society of Chemistry journal article supplement (doi:10.1039/d1ra08088a), 2022-01-01
Supplement: d1ra08088a1.pdf [file d1ra08088a1.pdf]

## Supplementary Material

### **Hollow terbium metal-organic-framework spheres: Preparation and their performance in Fe<sup>3+</sup> detection**

Xiaozhan Yang<sup>1,2,\*</sup>, Yicun Liang<sup>1</sup>, Wenlin Feng<sup>1,2</sup>, Chaolong Yang<sup>3</sup>, Lian Wang<sup>4</sup>,  
Guojia Huang<sup>5</sup>, Daoyuan Wang<sup>6</sup>

<sup>1</sup>School of Science, Chongqing University of Technology, Chongqing 400054, China.

<sup>2</sup>Chongqing Key Laboratory of Green Energy Materials Technology and Systems, Chongqing 400054, China.

<sup>3</sup>School of Materials Science and Engineering, Chongqing University of Technology, Chongqing 400054, China.

<sup>4</sup>Guangzhou Special Pressure Equipment Inspection and Research Institute, Guangzhou 510663, China.

<sup>5</sup>Department of Department of Medical Research, Guangdong Provincial People's Hospital, Guangdong Academy of Medical Sciences, Guangzhou 51000, China.

<sup>6</sup>Department of Chemistry and Physics, University of Arkansas at Pine Bluff, AR 71601, USA.

**Key words:** Tb-MOFs, Hollow sphere, Luminescence, Fe<sup>3+</sup> sensing

## Table of Contents

**Table S-1.** Crystallographic data of Tb-MOFs.

**Table S-2** Partial bond lengths in Tb-MOFs crystal.

**Table S-3.** Partial bond angles in Tb-MOFs crystal.

**Table S-4.** Amount of  $\text{Tb}(\text{NO}_3)_3 \cdot 6\text{H}_2\text{O}$ ,  $\text{H}_3\text{BTC}$  and  $\text{H}_2\text{TDC}$  in the synthesis of Tb-MOFs.

**Table S-5.** Elemental analysis data for 1 h, 2 h, 3 h, 4 h, 6 h and 72 h during Tb-MOFs preparation.

**Table S-6.** Elemental data of Tb-MOFs with different  $\text{H}_3\text{BTC}/\text{H}_2\text{TDC}$  ratio.

**Figure S1** The Synthesis flow chart of Tb-MOFs.

**Figure S2** Coordination diagram in Tb-MOFs.

**Figure S3** XRD patterns of Tb-MOFs.

**Figure S4** TG curves of Tb-MOFs.

**Figure S5** a-g) SEM images of Tb-MOF with different  $\text{H}_3\text{BTC}/\text{H}_2\text{TDC}$  ratio of (1:1, 2:1, 3:1, 4:1, 1:2, 1:3, 1:4), h) SEM image of Tb-MOF outer surface with the  $\text{H}_3\text{BTC}/\text{H}_2\text{TDC}$  ratio of 1:2. (All scales are 1  $\mu\text{m}$ )

**Figure S6** Line scanning profiles of Tb element distribution.

**Figure S7** a) Emission spectra of Tb-MOFs with different  $\text{H}_3\text{BTC}/\text{H}_2\text{TDC}$  ratios, b) Excitation and c) Emission spectra of the solid-state Tb-MOF,  $\text{Fe}^{3+}@\text{Tb-MOF}$  and  $\text{H}_3\text{BTC}$ , d) Emission spectrum of  $\text{H}_3\text{BTC}$  under 290 nm excitation.

**Figure S8** The selectivity of Tb-MOFs to Fe ions with multiple ions exist simultaneously in aqueous.

**Figure S9** The selectivity of Tb-MOFs to  $\text{Fe}^{3+}$  in DMF system.

**Figure S10.** a) Histogram of Tb-MOFs luminescence intensities in DMF solutions with different metal ions (at 545 nm), and the inset is emission spectra. b) Emission spectra of Tb-MOFs in various concentrations of  $\text{Fe}^{3+}$  solutions, and the inset is emission spectra near 545 nm. c) Fitting curves of luminescence intensities of Tb-MOFs versus  $\text{Fe}^{3+}$  concentrations (0-150  $\mu\text{M}$ ), and the inset is luminescence intensities versus low  $\text{Fe}^{3+}$  concentration (0-10  $\mu\text{M}$ ). d) Stern-Volmer fitting curve ( $\text{Fe}^{3+}$  concentration: 0-150  $\mu\text{M}$ ), and the inset is Stern-Volmer fitting curve at low  $\text{Fe}^{3+}$  concentration: 0-8  $\mu\text{M}$ ).

## Supporting Tables

**Table S-1.** Crystallographic data of Tb-MOFs

| <b>Chemical formula</b>     | <b>C<sub>15</sub>H<sub>17</sub>N<sub>2</sub>O<sub>8</sub>Tb</b> |
|-----------------------------|-----------------------------------------------------------------|
| Formula weight              | 512.22                                                          |
| Crystal system              | monoclinic                                                      |
| Space group                 | C2/c                                                            |
| Unit cell dimensions        |                                                                 |
| a (Å)                       | 18.6318(8)                                                      |
| b (Å)                       | 11.445(5)                                                       |
| c (Å)                       | 19.7386(8)                                                      |
| α(°)                        | 90                                                              |
| β(°)                        | 106.504(1)                                                      |
| γ(°)                        | 90                                                              |
| V (Å <sup>3</sup> )         | 4035.7                                                          |
| Z                           | 8                                                               |
| T (K)                       | 193K                                                            |
| λ(Å)                        | 1.34139                                                         |
| Dcalcd(g cm <sup>-3</sup> ) | 1.686                                                           |
| μ(mm <sup>-1</sup> )        | 18.426                                                          |
| F (0 0 0)                   | 2000                                                            |
| θ range (°)                 | 3.991-54.948                                                    |
| Reflection collected        | 15934                                                           |
| independent reflections     | 5323                                                            |
| Goodness-of-fit (Gof)       | 1.076                                                           |
| Rint                        | 0.0554                                                          |
| R1(I > 2σ(I))               | 0.0395                                                          |
| WR2(I > 2σ(I))              | 0.1101                                                          |
| ρmaximum/ρminimum           | 1.504/-2.022                                                    |
| CCDC                        | 2082489                                                         |

**Table S-2** Partial bond lengths in Tb-MOFs crystal

| <b>Tb-MOFs</b> |      |            |
|----------------|------|------------|
| Tb01           | O002 | 2.443(4) Å |
| Tb01           | O003 | 2.330(4) Å |
| Tb01           | O004 | 2.283(4) Å |
| Tb01           | O005 | 2.399(4) Å |
| Tb01           | O006 | 2.415(4) Å |
| Tb01           | O007 | 2.379(5) Å |
| Tb01           | O008 | 2.356(4) Å |
| Tb01           | O009 | 2.413(4) Å |

**Table S-3.** Partial bond angles in Tb-MOFs crystal

| Tb-MOFs |      |      |             |
|---------|------|------|-------------|
| O003    | Tb01 | O002 | 124.98(13)° |
| O003    | Tb01 | O005 | 75.38(14)°  |
| O003    | Tb01 | O006 | 123.36(15)° |
| O003    | Tb01 | O007 | 148.35(16)° |
| O003    | Tb01 | O008 | 78.57(16)°  |
| O003    | Tb01 | O009 | 78.45(15)°  |
| O004    | Tb01 | O002 | 78.95(14)°  |
| O004    | Tb01 | O003 | 83.94(14)°  |
| O004    | Tb01 | O005 | 93.55(17)°  |
| O004    | Tb01 | O006 | 149.27(14)° |
| O004    | Tb01 | O007 | 78.56(18)°  |
| O004    | Tb01 | O008 | 84.38(17)°  |
| O004    | Tb01 | O009 | 156.56(14)° |
| O005    | Tb01 | O002 | 54.30(12)°  |
| O005    | Tb01 | O006 | 81.73(18)°  |
| O005    | Tb01 | O009 | 96.81(18)°  |
| O006    | Tb01 | O002 | 73.65(14)°  |
| O006    | Tb01 | C00A | 75.69(16)°  |
| O007    | Tb01 | O002 | 77.26(15)°  |
| O007    | Tb01 | O005 | 131.47(15)° |
| O007    | Tb01 | O006 | 82.02(18)°  |
| O007    | Tb01 | O009 | 109.21(19)° |
| O008    | Tb01 | O002 | 148.79(15)° |
| O008    | Tb01 | O005 | 153.94(16)° |
| O008    | Tb01 | O006 | 112.66(18)° |
| O008    | Tb01 | O007 | 73.66(17)°  |

**Table S-4.** Amount of Tb(NO<sub>3</sub>)<sub>3</sub>·6H<sub>2</sub>O, H<sub>3</sub>BTC and H<sub>2</sub>TDC in the synthesis of Tb-MOFs

| Tb(NO <sub>3</sub> ) <sub>3</sub> ·6H <sub>2</sub> O | H <sub>3</sub> BTC | H <sub>2</sub> TDC | H <sub>3</sub> BTC/H <sub>2</sub> TDC ratio |
|------------------------------------------------------|--------------------|--------------------|---------------------------------------------|
| 1 mmol, 0.453 g                                      | 1 mmol, 0.210 g    | 1 mmol, 0.172 g    | 1:1                                         |
| 1 mmol, 0.453 g                                      | 4/3 mmol, 0.280 g  | 2/3 mmol, 0.115 g  | 2:1                                         |
| 1 mmol, 0.453 g                                      | 3/2 mmol, 0.069 g  | 1/2 mmol, 0.086 g  | 3:1                                         |
| 1 mmol, 0.453 g                                      | 8/5 mmol, 0.336 g  | 2/5 mmol, 0.069 g  | 4:1                                         |
| 1 mmol, 0.453 g                                      | 2/3 mmol, 0.140 g  | 4/3 mmol, 0.229 g  | 1:2                                         |
| 1 mmol, 0.453 g                                      | 1/2 mmol, 0.105 g  | 3/2 mmol, 0.258 g  | 1:3                                         |
| 1 mmol, 0.453 g                                      | 2/5 mmol, 0.084 g  | 8/5 mmol, 0.275 g  | 1:4                                         |

**Table S-5.** Elemental analysis data for 1 h, 2 h, 3 h, 4 h, 6 h and 72 h during Tb-MOFs preparation.

| Time | Tb (%) | C (%) | H (%) | O (%) | N (%) |
|------|--------|-------|-------|-------|-------|
| 1 h  | 32.63  | 35.45 | 3.42  | 37.46 | 1.02  |
| 2 h  | 33.27  | 35.20 | 3.74  | 25.11 | 2.69  |
| 3 h  | 19.09  | 30.77 | 3.82  | 42.96 | 3.36  |
| 4 h  | 37.06  | 35.57 | 1.97  | 21.36 | 4.04  |
| 6 h  | 32.04  | 35.27 | 3.18  | 24.34 | 5.17  |
| 72 h | 31.05  | 35.15 | 3.32  | 25.00 | 5.47  |

**Table S-6.** Elemental data of Tb-MOFs with different H3BTC/H2TDC ratio.

| H <sub>3</sub> BTC/H <sub>2</sub> TDC ratio | Tb (%) | C (%) | H (%) | O (%) | N (%) |
|---------------------------------------------|--------|-------|-------|-------|-------|
| 1:4                                         | 30.26  | 36.07 | 2.43  | 26.23 | 5.01  |
| 1:3                                         | 32.33  | 35.48 | 2.34  | 25.02 | 4.83  |
| 1:2                                         | 31.72  | 35.32 | 3.48  | 24.46 | 5.02  |
| 1:1                                         | 31.05  | 35.15 | 3.32  | 25.05 | 5.42  |
| 2:1                                         | 32.46  | 34.43 | 3.43  | 24.89 | 4.79  |
| 3:1                                         | 31.81  | 36.27 | 3.13  | 24.27 | 4.52  |
| 4:1                                         | 32.17  | 34.14 | 3.50  | 25.13 | 5.06  |

## Supporting Figures

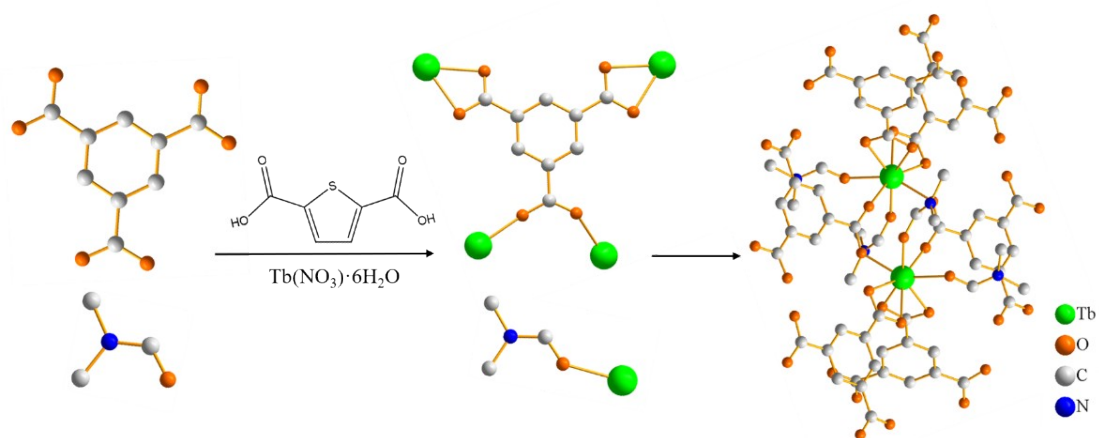

**Figure S1** The Synthesis flow chart of Tb-MOFs.

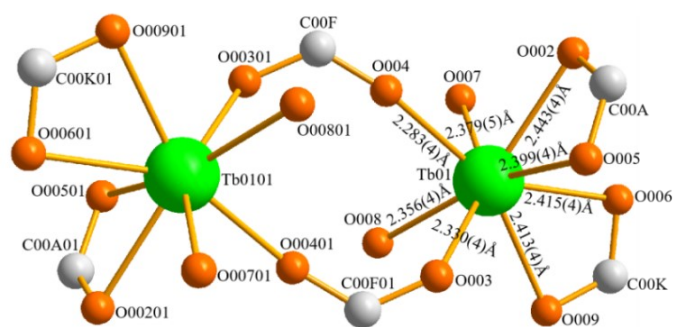

**Figure S2** Coordination diagram in Tb-MOFs.

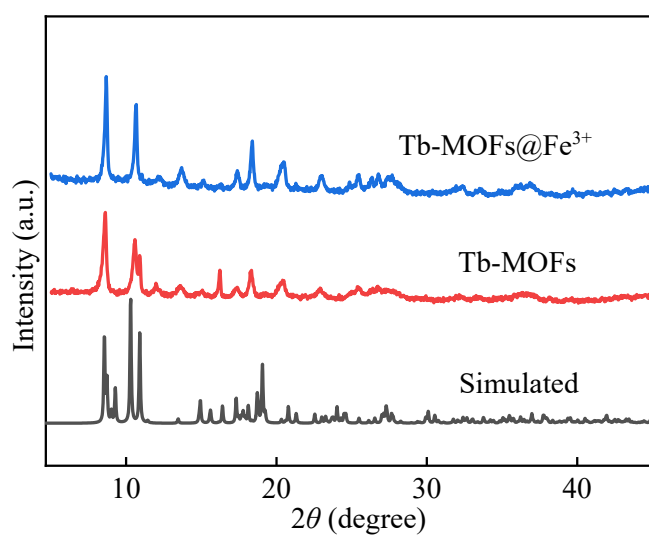

**Figure S3** XRD patterns of Tb-MOFs.

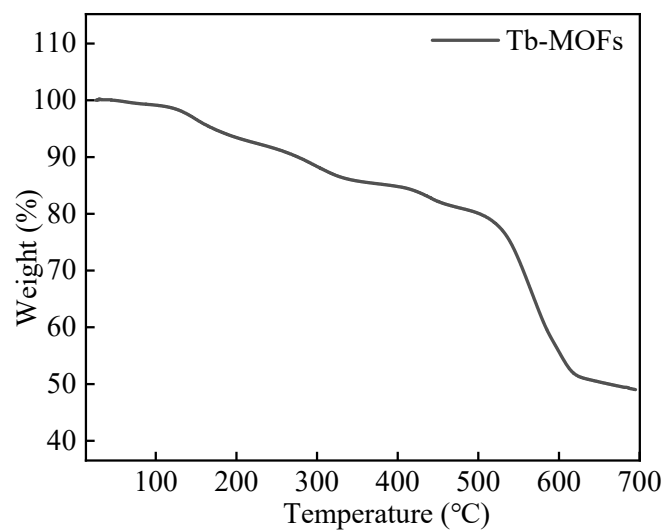

**Figure S4** TG curves of Tb-MOFs.

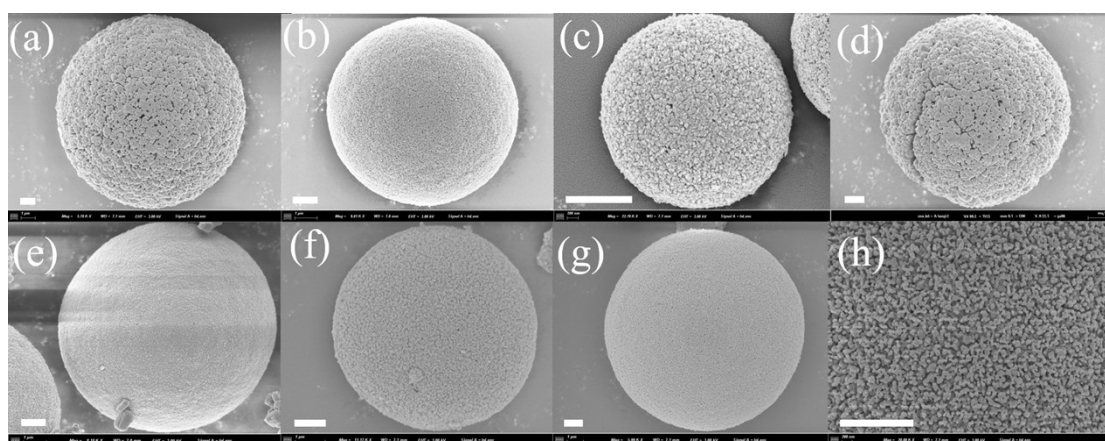

**Figure S5** a-g) SEM images of Tb-MOF with different H<sub>3</sub>BTC/H<sub>2</sub>TDC ratio of (1:1, 2:1, 3:1, 4:1, 1:2, 1:3, 1:4), h) SEM image of Tb-MOF outer surface with the H<sub>3</sub>BTC/H<sub>2</sub>TDC ratio of 1:2. (All scales are 1 μm)

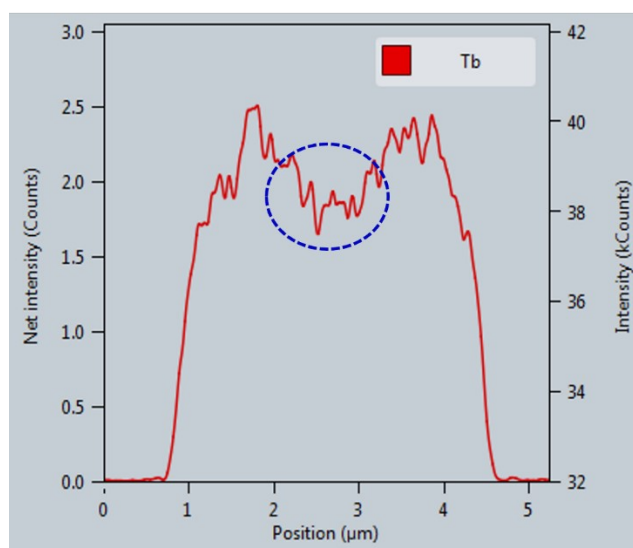

**Figure S6** Line scanning profiles of Tb element distribution.

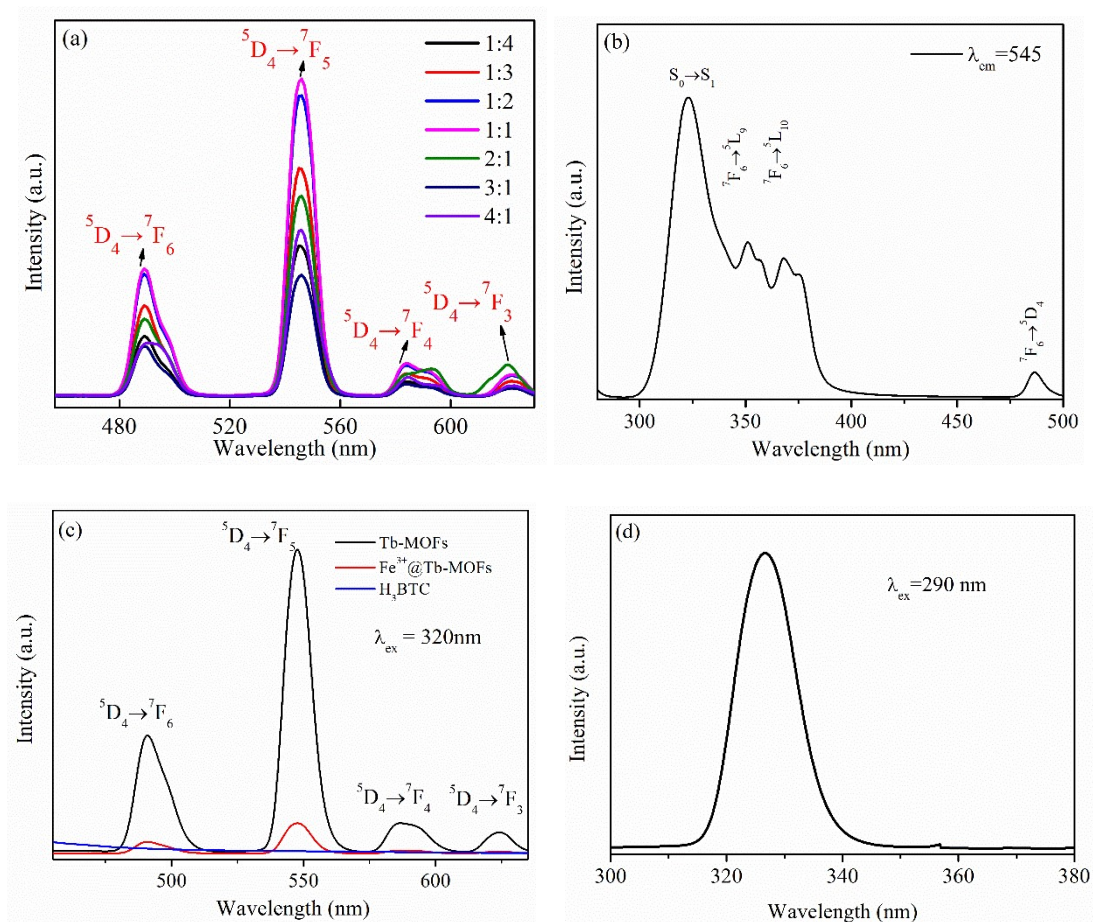

**Figure S7** a) Emission spectra of Tb-MOFs with different H<sub>3</sub>BTC/H<sub>2</sub>TDC ratios, b) Excitation and c) Emission spectra of the solid-state Tb-MOF, Fe<sup>3+</sup>@Tb-MOF and H<sub>3</sub>BTC, d) Emission spectrum of H<sub>3</sub>BTC under 290 nm excitation.

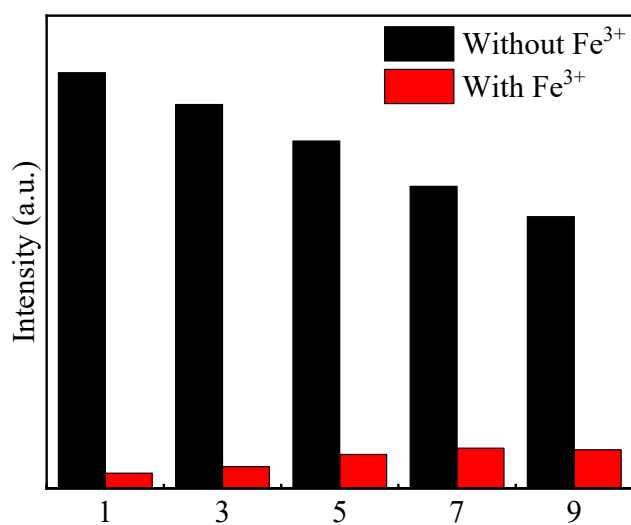

**Figure S8** The selectivity of Tb-MOFs to Fe ions with multiple ions exist simultaneously in aqueous.



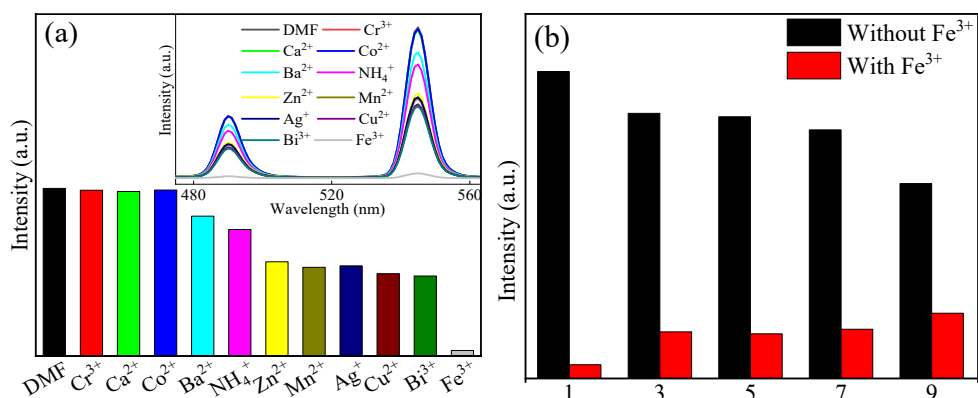

**Figure S9** The selectivity of Tb-MOFs to  $\text{Fe}^{3+}$  in DMF system.

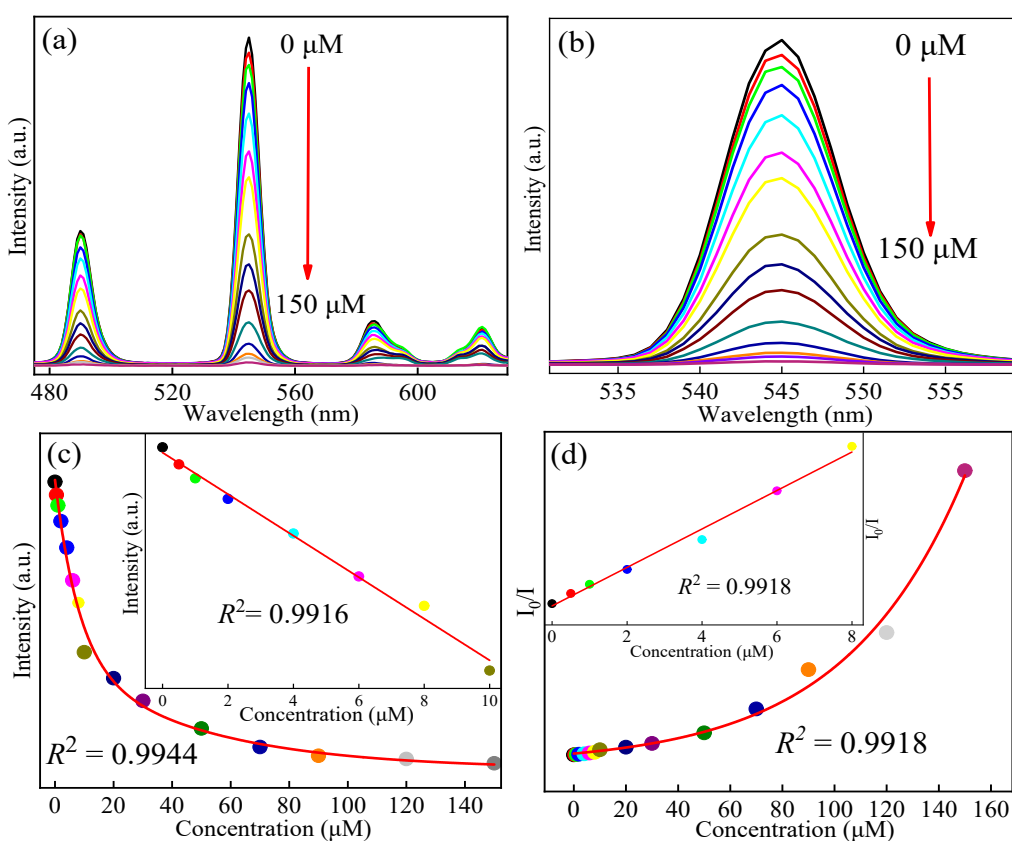

**Figure S10.** a) Histogram of Tb-MOFs luminescence intensities in DMF solutions with different metal ions (at 545 nm), and the inset is emission spectra. b) Emission spectra of Tb-MOFs in various concentrations of  $\text{Fe}^{3+}$  solutions, and the inset is emission spectra near 545 nm. c) Fitting curves of luminescence intensities of Tb-MOFs versus  $\text{Fe}^{3+}$  concentrations (0-150  $\mu\text{M}$ ), and the inset is luminescence intensities versus low  $\text{Fe}^{3+}$  concentration (0-10  $\mu\text{M}$ ). d) Stern-Volmer fitting curve ( $\text{Fe}^{3+}$  concentration: 0-150  $\mu\text{M}$ ), and the inset is Stern-Volmer fitting curve at low  $\text{Fe}^{3+}$  concentration: 0-8  $\mu\text{M}$ ).
